# Supplementary material for: High genetic and haplotype diversity in vaccine candidate Pfceltos but not Pfrh5 among malaria-infected children in Ibadan, Nigeria
Source: PeerJ. 2023 Dec 11;11:e16519. doi: 10.7717/peerj.16519 (PMC10720411; doi:10.7717/peerj.16519)
Supplement: Table S1 [file peerj-11-16519-s003.xlsx]

## Sheet: Sheet1
Sliding Window	Midpoint	Tajima's D value
1-100	50	-0.0431
26-125	75	-0.3068
51-150	100	-0.246
76-175	125	-0.0704
101-200	150	-0.2776
126-225	175	0.2744
151-250	200	0.6981
176-275	225	0
201-300	250	0
226-325	275	0
251-350	300	0
276-370	323	0
