# Supplementary material for: High genetic and haplotype diversity in vaccine candidate Pfceltos but not Pfrh5 among malaria-infected children in Ibadan, Nigeria
Source: PeerJ. 2023 Dec 11;11:e16519. doi: 10.7717/peerj.16519 (PMC10720411; doi:10.7717/peerj.16519)
Supplement: Table S2 [file peerj-11-16519-s004.xlsx]

## Sheet: Sheet1
Sliding Window	Midpoint	Tajima's D value
1-100	50	0
26-125	75	0
51-150	100	0
76-175	125	0
101-200	150	-0.0861
126-225	175	-0.0861
151-250	200	-0.0861
176-275	225	-0.0861
201-300	250	0
226-325	275	0
251-350	300	-0.5916
276-375	325	-0.7686
301-400	350	-0.7686
326-425	375	-0.7686
351-450	400	-0.5916
376-475	425	0
401-500	450	0
426-525	475	0
451-550	500	0
476-575	525	0
501-600	550	0
526-625	575	0
551-650	600	0
576-675	625	0
601-678	639	0
